# Supplementary material for: Mitotic lamin disassembly is triggered by lipid-mediated signaling
Source: PubMed Central journal article supplement — J Cell Biol. 2012 Sep 17;198(6):981–90. doi: 10.1083/jcb.201205103 (PMC3444782; doi:10.1083/jcb.201205103), 2012-09-17
Supplement: supp_jcb.201205103_JCB_201205103_sm.pdf [file supp_jcb.201205103_JCB_201205103_sm.pdf]

Mall et al., <http://www.jcb.org/cgi/content/full/jcb.201205103/DC1>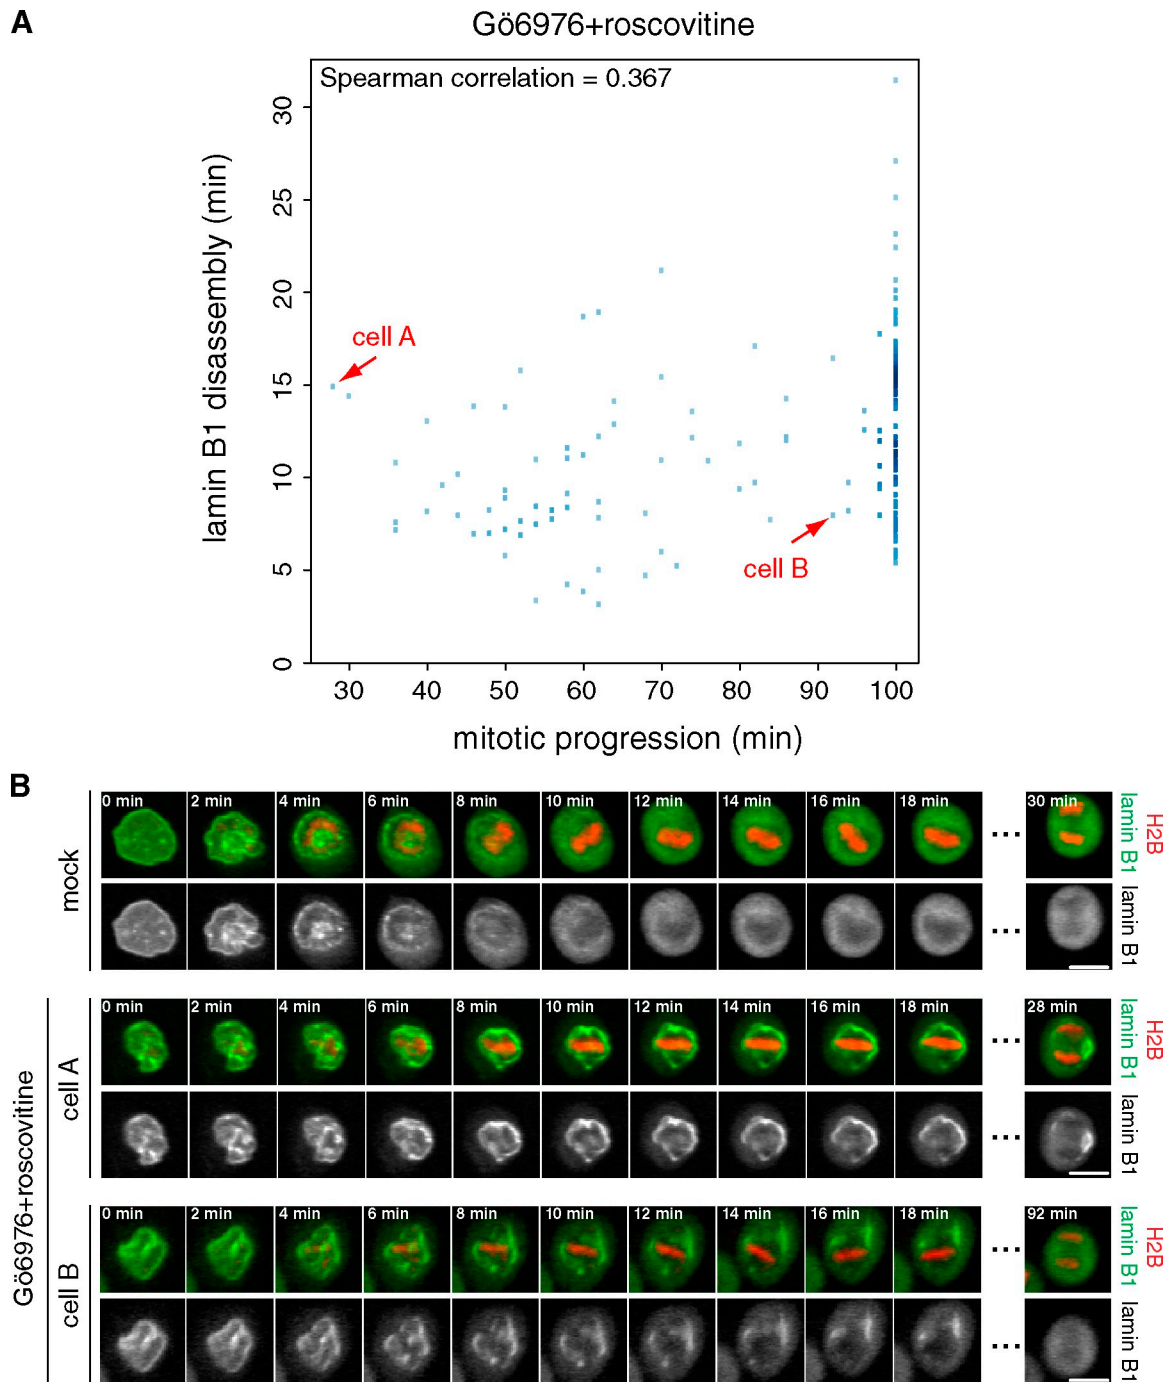

Figure S1. **Delay of lamin B1 disassembly and mitotic progression are uncoupled events in single cells.** (A) Lamin B1 disassembly duration and mitotic progression in individual cells from the cell population in Fig. 3 (C and D), synchronized by double thymidine arrest and treated with a combination of 2  $\mu$ M Gö6976 and 50  $\mu$ M roscovitine ~30–60 min before mitotic entry, were plotted, and their Spearman correlation was determined. Cells exceeding the quantitation cutoff for mitotic progression delay (>100 min) are plotted at 100 min. The data represent mitotic events from four replicate experiments. (B) Representative time-lapse microscopy images of mitotic HeLa cells stably coexpressing H2B-mCherry and GFP-lamin B1 (green and gray) after DMSO treatment (mock) and time-lapse microscopy images of indicated cells treated with a combination of 2  $\mu$ M Gö6976 and 50  $\mu$ M roscovitine. Mitotic entry as well as anaphase is shown relative to the onset of prophase, scored automatically by chromatin condensation, as time 0. Cell A shows an example of delayed lamin B1 disassembly but no delay in mitotic progression, and cell B shows the opposite phenotype. Bars, 10  $\mu$ m.

**A**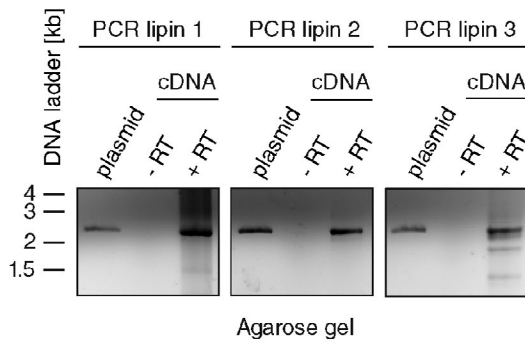**B**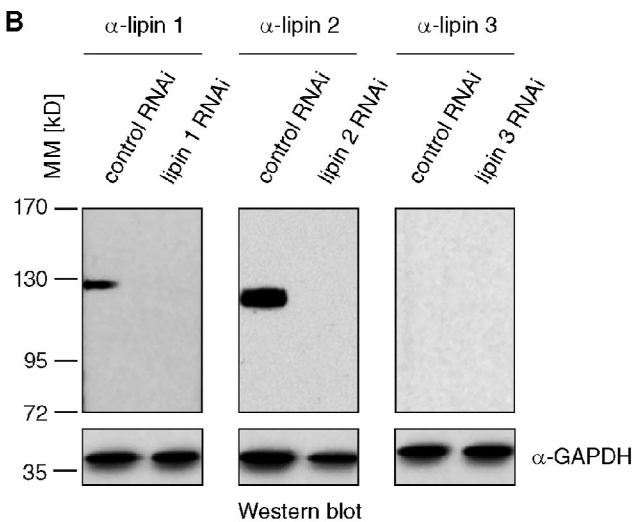**C**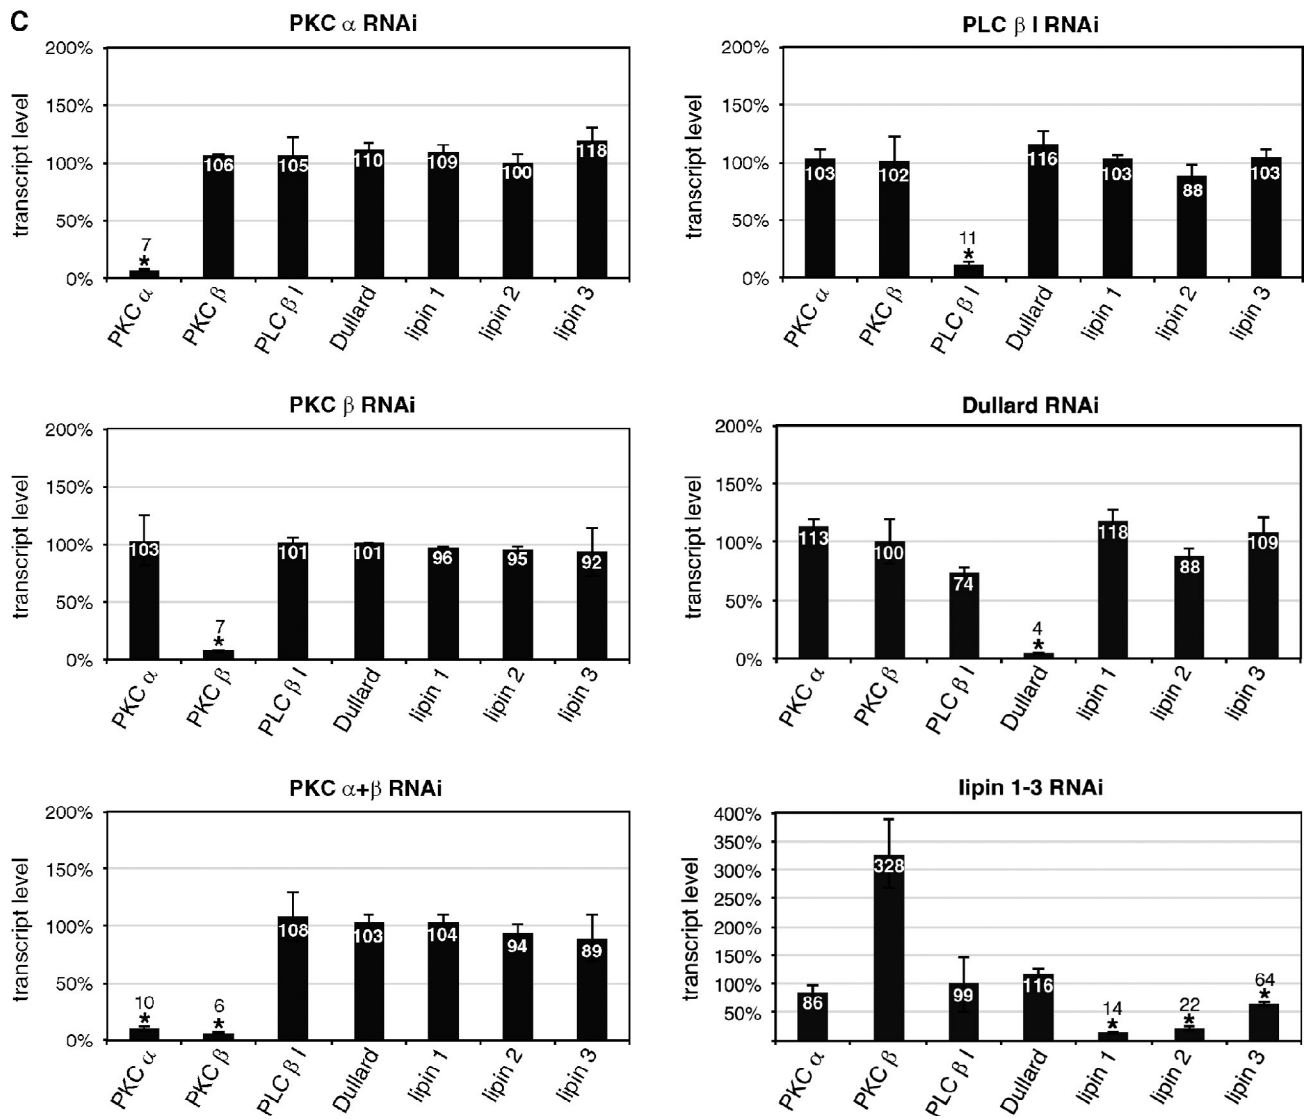

Figure S2. **Lipin 1–3 expression in HeLa Kyoto cells and validation of RNAi efficiency.** (A) PCR amplification of the denoted lipin isoforms from plasmids encoding the corresponding lipin cDNA or HeLa cDNA preparations generated with (+) or without (–) reverse transcription (RT). Sequencing of the PCR products confirmed expression of all three lipin isoforms (not depicted). (B) Western blot of HeLa whole-cell lysate after RNAi treatment using control oligos or oligos against the indicated lipin isoforms. Western blot detection was performed using antibodies raised against the denoted lipin isoforms, and GAPDH served as a loading control. (C) Expression levels of denoted transcripts in HeLa cells after the indicated RNAi treatment were determined by quantitative real-time PCR. Expression levels were normalized to control RNAi treatment and GAPDH expression. The results represent mean transcript levels from three replicate experiments. \*,  $P < 0.05$  ( $t$  test). Error bars indicate standard error of the mean. MM, molecular mass.

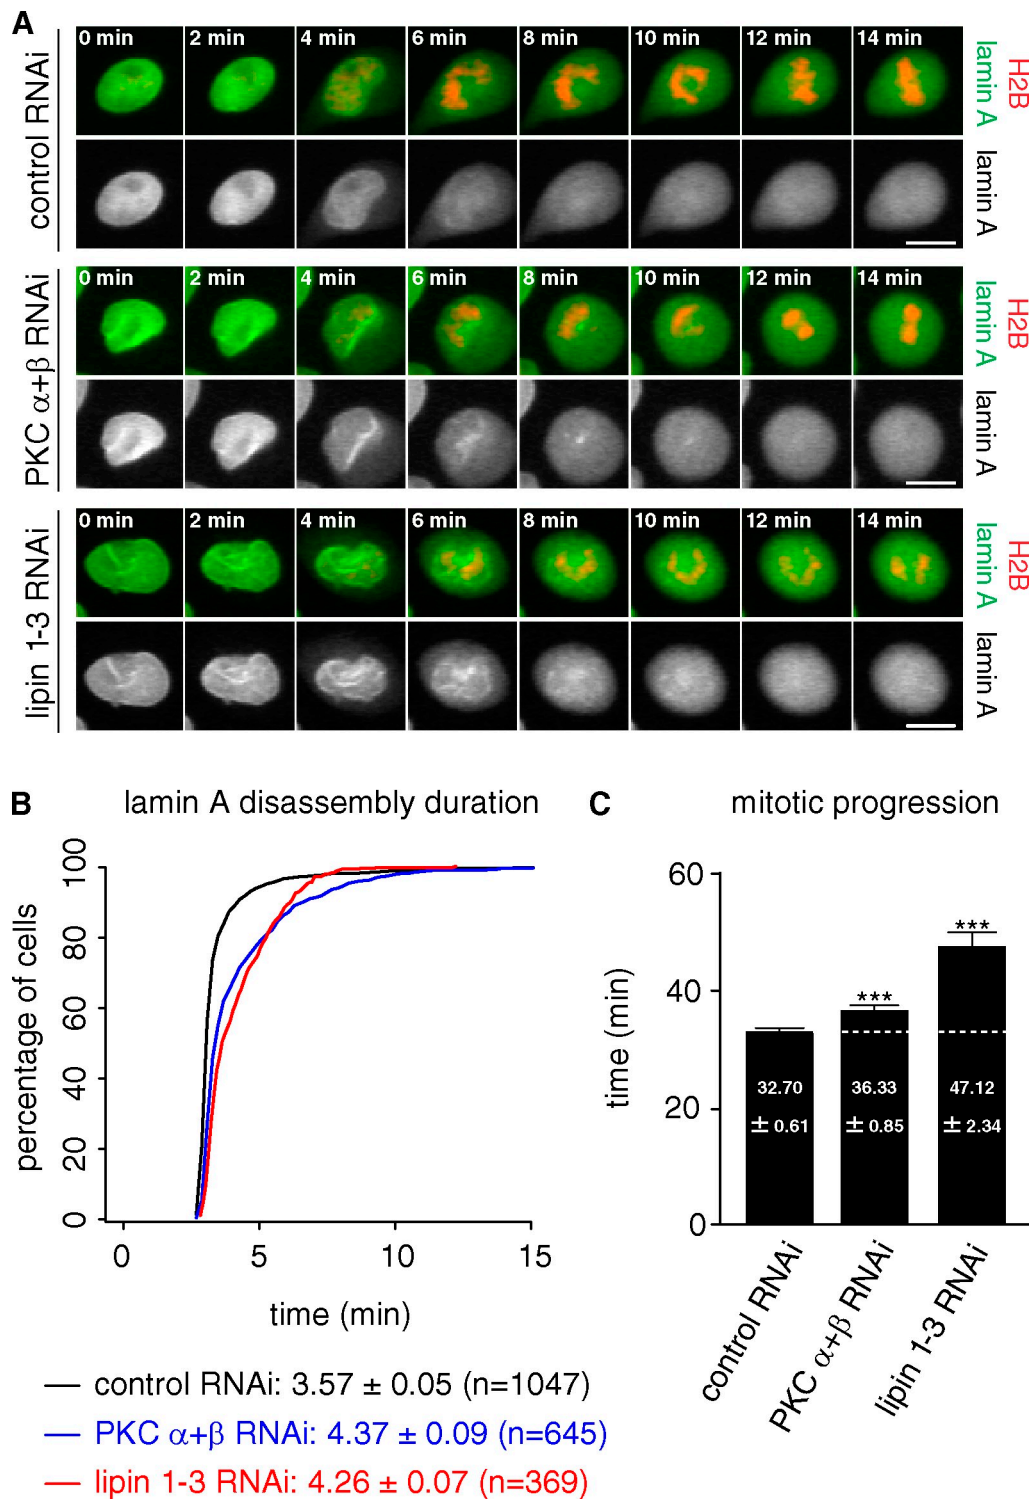

Figure S3. **cPKCs and lipins affect mitotic lamin A disassembly.** (A) Representative time-lapse microscopy images of mitotic HeLa cells stably coexpressing H2B-mCherry and GFP-lamin A (green and gray) after transfection with siRNA oligos against the indicated transcripts or control oligos. Progression through mitosis was followed, and time relative to chromatin condensation in prophase is shown. Bars, 10  $\mu$ m. (B) Cumulative histograms of lamin A disassembly durations after the indicated RNAi treatment quantified as described in Fig. 2.  $P < 0.0001$  (*U* test) in which PKC- $\alpha$  and - $\beta$  or lipin 1-3 RNAi were compared with control RNAi. (C) Mean mitosis durations of cells quantified in B. The data represent the mitotic events from two replicate experiments, with \*\*\*,  $P < 0.0001$  (*U* test). Dotted line indicates mean control timing. Error bars indicate 95% confidence intervals.

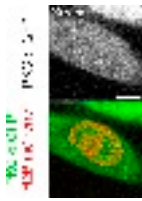

Video 1. **Localization of PKC- $\alpha$  during NEBD in mammalian cells.** HeLa cells stably expressing H2B-mCherry and transiently expressing PKC- $\alpha$  tagged with GFP (green and gray) at the C terminus during mitotic entry. Progression into mitosis was analyzed by time-lapse microscopy using a laser-scanning confocal microscope (LSM 510). Frames were taken every 30 s for 3 min, and time relative to NEBD is shown. Bar, 10  $\mu$ m.

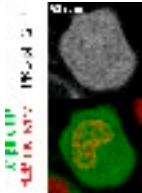

Video 2. **Localization of PKC- $\beta$ II during NEBD in mammalian cells.** HeLa cells stably expressing H2B-mCherry and transiently expressing PKC- $\beta$ II tagged with GFP (green and gray) at the C terminus during mitotic entry. Progression into mitosis was analyzed by time-lapse microscopy using a laser-scanning confocal microscope (LSM 510). Frames were taken every 30 s for 3 min, and time relative to NEBD is shown. Bar, 10  $\mu$ m.

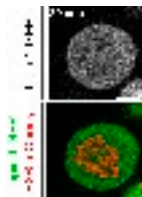

Video 3. **Localization of lipin 1 during NEBD in mammalian cells.** HeLa cells stably expressing H2B-mCherry and transiently expressing lipin 1 tagged with GFP (green and gray) at the C terminus during mitotic entry. Progression into mitosis was analyzed by time-lapse microscopy using a laser-scanning confocal microscope (LSM 510). Frames were taken every 30 s for 3 min, and time relative to NEBD is shown. Bar, 10  $\mu$ m.

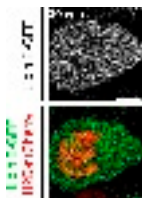

Video 4. **Localization of lipin 2 during NEBD in mammalian cells.** HeLa cells stably expressing H2B-mCherry and transiently expressing lipin 2 tagged with GFP (green and gray) at the C terminus during mitotic entry. Progression into mitosis was analyzed by time-lapse microscopy using a laser-scanning confocal microscope (LSM 510). Frames were taken every 30 s for 3 min, and time relative to NEBD is shown. Bar, 10  $\mu$ m.

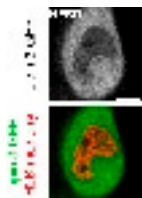

Video 5. **Localization of lipin 3 during NEBD in mammalian cells.** HeLa cells stably expressing H2B-mCherry and transiently expressing lipin 3 tagged with GFP (green and gray) at the C terminus during mitotic entry. Progression into mitosis was analyzed by time-lapse microscopy using a laser-scanning confocal microscope (LSM 510). Frames were taken every 30 s for 3 min, and time relative to NEBD is shown. Bar, 10  $\mu$ m.

Table S1. **Quantification of lamin B1 disassembly and mitotic progression in cells stably expressing H2B-mCherry transfected with GFP-lamin B1**

| Treatment         | Lamin disassembly | P (U test) | Mitotic progression | P (U test) | Chromosome congression | P (U test) | n   |
|-------------------|-------------------|------------|---------------------|------------|------------------------|------------|-----|
|                   | <i>min ± CI</i>   |            | <i>min ± CI</i>     |            | <i>min ± CI</i>        |            |     |
| Wild type         | 7.51 ± 0.87       | NA         | 43.94 ± 2.44        | NA         | 36.76 ± 2.44           | NA         | 192 |
| PKC mutant        | 7.17 ± 0.83       | 0.7106     | 45.20 ± 2.61        | 0.0491     | 35.76 ± 2.35           | 0.4964     | 157 |
| CDK1 mutant       | 8.24 ± 0.79       | 0.0146     | 44.06 ± 2.38        | 0.1627     | 35.63 ± 2.23           | 0.5464     | 164 |
| CDK1 + PKC mutant | 8.86 ± 0.80       | <0.0000    | 44.64 ± 2.59        | 0.1995     | 34.04 ± 1.92           | 0.9329     | 163 |

Lamin disassembly shows mean duration. Mitotic progression is mean duration from prophase to anaphase. Chromosome congression is mean duration of prometaphase and metaphase. CI, confidence interval; NA, not available.

Table S2. **Quantification of lamin B1 disassembly and mitotic progression in cells stably coexpressing GFP-lamin B1 and H2B-mCherry**

| Treatment             | Lamin disassembly | P (U test) | Mitotic progression | P (U test) | Chromosome congression | P (U test) | n     |
|-----------------------|-------------------|------------|---------------------|------------|------------------------|------------|-------|
|                       | <i>min ± CI</i>   |            | <i>min ± CI</i>     |            | <i>min ± CI</i>        |            |       |
| Mock                  | 6.24 ± 0.16       | NA         | 27.33 ± 0.75        | NA         | 24.96 ± 0.71           | NA         | 829   |
| Gö6976                | 8.10 ± 0.21       | <0.0000    | 56.21 ± 1.82        | <0.0000    | 51.92 ± 1.78           | <0.0000    | 683   |
| Roscovitine           | 8.07 ± 0.36       | <0.0000    | 70.33 ± 2.49        | <0.0000    | 63.43 ± 2.44           | <0.0000    | 410   |
| Gö6976 + roscovitine  | 11.95 ± 0.79      | <0.0000    | 82.29 ± 3.62        | <0.0000    | 77.66 ± 3.54           | <0.0000    | 147   |
| Mock                  | 5.79 ± 0.19       | NA         | 27.27 ± 1.04        | NA         | 25.26 ± 1.00           | NA         | 463   |
| Propranolol           | 7.93 ± 0.66       | <0.0000    | 49.32 ± 3.10        | <0.0000    | 47.15 ± 3.00           | <0.0000    | 228   |
| U73122                | 5.81 ± 0.27       | 0.3955     | 33.06 ± 2.17        | <0.0000    | 30.16 ± 2.04           | <0.0000    | 213   |
| Control RNAi          | 7.12 ± 0.15       | NA         | 27.97 ± 0.61        | NA         | 25.02 ± 0.56           | NA         | 1,072 |
| PKC-α RNAi            | 8.44 ± 0.20       | <0.0000    | 39.44 ± 1.14        | <0.0000    | 35.85 ± 1.11           | <0.0000    | 808   |
| PKC-β RNAi            | 8.46 ± 0.26       | <0.0000    | 33.69 ± 0.99        | <0.0000    | 29.93 ± 0.92           | <0.0000    | 715   |
| PKC-α + -β RNAi       | 7.93 ± 0.18       | <0.0000    | 34.10 ± 0.99        | <0.0000    | 29.79 ± 0.89           | <0.0000    | 708   |
| PLC-β1 RNAi           | 7.27 ± 0.18       | 0.0784     | 30.39 ± 0.70        | <0.0000    | 27.07 ± 0.65           | <0.0000    | 925   |
| Lipin 1-3 RNAi        | 9.14 ± 0.43       | <0.0000    | 40.74 ± 2.41        | <0.0000    | 38.39 ± 2.39           | <0.0000    | 301   |
| Dullard RNAi          | 8.02 ± 0.17       | <0.0000    | 29.49 ± 0.78        | <0.0000    | 27.11 ± 0.76           | <0.0000    | 766   |
| Control RNAi + mock   | 7.37 ± 0.27       | NA         | 27.98 ± 1.17        | NA         | 24.71 ± 1.09           | NA         | 394   |
| Control RNAi + DAG    | 6.93 ± 0.21       | 0.9993     | 28.47 ± 0.99        | 0.527      | 26.34 ± 0.94           | 0.0012     | 666   |
| Lipin 1-3 RNAi + mock | 9.02 ± 0.47       | <0.0000    | 34.75 ± 2.85        | <0.0000    | 32.21 ± 2.75           | <0.0000    | 149   |
| Lipin 1-3 RNAi + DAG  | 7.40 ± 0.30       | 0.2626     | 29.01 ± 1.46        | 0.0372     | 27.05 ± 1.35           | <0.0000    | 268   |

Lamin disassembly shows mean duration. Mitotic progression is mean duration from prophase to anaphase. Chromosome congression is mean duration of prometaphase and metaphase. CI, confidence interval; NA, not available.

Table S3. DNA primers used for quantitative PCR, cloning, and mutagenesis

| PCR target                          | Forward primer 5' → 3'                       | Reverse primer 5' → 3'           |
|-------------------------------------|----------------------------------------------|----------------------------------|
| GAPDH                               | CATGAGAAGTATGACAACAGCCT                      | AGTCCTTCCACGATACCAAAGT           |
| Lipin 1                             | GCTGCCAAGCCATCAAAC                           | GGGGCCATTCTCAACTTC               |
| Lipin 2                             | ACCTTTTCACGTTTCGGTTTG                        | TGCACTGCCGTTGATTCTA              |
| Lipin 3                             | GTCTTCAGCGTGACCACTCA                         | ACAGGTAGATGGTGGCCTTG             |
| Dullard                             | CTCTGGAGCTTCTTCATTACCTT                      | CACAGGAGATAAGGGGAGGA             |
| PKC- $\alpha$                       | TCGACTGGGAAAAACTGGAG                         | CTCTGCTCCTTTGCCACAC              |
| PKC- $\beta$                        | GGCGAAATGCTGAAAACCTC                         | AGCTCTGACTTCGGGTTTT              |
| PLC- $\beta$ I                      | TCGCACAACACCTACCTCAC                         | GCACCTGGCGATACATCTCA             |
| pET28a-lipin 1 (aa 128–377)         | GCGCGCTAGCATGAGAGGCCTGGAC                    | GCGCCTCGAGTACTTGTTCGTGTCTGG      |
| pET28a-lipin 2 (aa 259–381)         | GCGCGCTAGCGAGTCTCACATGGAG                    | GCGCCTCGAGTTATTTAGCTGCCGGTTTGG   |
| pET28a-lipin 3 (aa 133–377)         | GCGCGCTAGCATGGCAGGCACGGCC                    | GCGCCTCGAGTACTGCCCGGTGGGAAC      |
| pEGFP-N3-lipin 1 (aa 1–890)         | GCGCAGATCTATGAATTACGTGGGG                    | GCGCGCCCCGCGGTCTGAGGCAGAATGAATG  |
| pEGFP-N3-lipin 2 (aa 1–896)         | GCGCAGATCTATGAATTATGTGGGA                    | GCGCGCCCCGCGGTAGACAGGTCATCCAG    |
| pEGFP-N3-lipin 3 (aa 1–851)         | GCGCAGATCTATGAACTACGTGGGG                    | GCGCGCCCCGCGGTCTCCAGGGTATCAAGGTC |
| pEGFP-N3-PCK- $\alpha$ (aa 1–672)   | GCGCGCTAGCATGGCTGACGTTTTTC                   | GCGCCTCGAGATACTGCACTCTGTAAGATG   |
| pEGFP-N3-PCK- $\beta$ II (aa 1–673) | GCGCGCTAGCATGGCTGACCCGGCT                    | GCGCCTCGAGAGCTCTGACTTCGGG        |
| pEGFP-N3-lamin B1 (S23A)            | CCACGCCGCTGGCCCCACGCGCC                      | –                                |
| pEGFP-N3-lamin B1 (S391A,S393A)     | AGAGAGGTTGAAGCTGGCTCCAGCCCCTTC<br>TCCCCGTGTG | –                                |
| pEGFP-N3-lamin B1 (S395A)           | CTGTCTCCAAGCCCTGCTTCCCCTGTGACAG              | –                                |
| pEGFP-N3-lamin B1 (S405A)           | AGTATCCCAGCATCCGCAAGTCGTAGTG<br>TACG         | –                                |

No reverse primers were used for the mutagenesis, indicated by dashes.
